# Supplementary material for: Molecular encoder–decoder based on an assembly of graphene oxide with dye-labelled DNA
Source: Royal Society of Chemistry journal article supplement (doi:10.1039/c4cc01242a), 2014-01-01
Supplement: c4cc01242a1.pdf [file c4cc01242a1.pdf]

## Supporting information

### **Molecular Encoder - Decoder** **Based on Assembly of Graphene with Dye-labeled DNA**

Yi He<sup>a</sup>, Yuting, Chen<sup>b</sup>, Chongying Li<sup>b</sup> and Hua, Cui<sup>a\*</sup>

*<sup>a</sup> CAS Key Laboratory of Soft Matter Chemistry, Department of Chemistry,*

*University of Science and Technology of China, Hefei, Anhui 230026, P. R. China*

*<sup>b</sup> College of Materials, Chemistry and Chemical Engineering, Chengdu University of Technology,  
Chengdu, Sichuan 610059, P. R. China*

Corresponding author: Prof. H. Cui,

Tel: +86-551-63606645

Fax: +86-551-63600730

Email: hcui@ustc.edu.cn

## Experimental Section

### 1. Chemicals and Apparatus

Tris(hydroxymethyl)aminomethane (Tris), hydrochloric acid (HCl), and sodium chloride (NaCl) were obtained from Sinopharm Chemical Reagent Co.,Ltd (Shanghai, China). Graphene oxide (GO) was synthesized from graphite (Shanghai, China) by a modified Hummers method<sup>1</sup> and characterized by. DNA oligonucleotides were synthesized and purified by Sangon Biotechnology Co., Ltd. (Shanghai, China). The sequences of these oligonucleotides are shown in Table S1. Ultrapure water was prepared by a Millipore Milli-Q system and used throughout.

Table S1 DNA sequences and modification

| DNA          | Sequences (5' to 3')                             |
|--------------|--------------------------------------------------|
| P1           | FAM-CAGAGGCAGTAACCA                              |
| P2           | ROX-CCTGGTGCCGTAGAT                              |
| P3           | Cy5-CCCTAATCCGCCAC                               |
| T1           | TGGTACTGCCTCTG                                   |
| T2           | ATCTACGGCACCAGG                                  |
| T3           | GTGGGCGGATTAGGG                                  |
| R            | GCAGAGCCAGTTCCT                                  |
| T1-T2        | TGGTACTGCCTCTGATCTACGGCACCAGG                    |
| T1-T3        | TGGTACTGCCTCTGGTGGGCGGATTAGGG                    |
| T2-T3        | GTGGGCGGATTAGGGATCTACGGCACCAGG                   |
| T1-T2-<br>T3 | TGGTACTGCCTCTGGTGGGCGGATTAGGG ATCTACGGCACCAGG    |
| P-C-P1       | TGGTACTGCCTCTGGCATA ATCTACGGCACCAGG              |
| T4           | TGGTACTGCCTCTGGTGGGCGGATTAGGGTATGCCAGAGGCAGTAACC |

A

UV-Vis detection was carried out on a UV-Vis spectrophotometer (Agilent 8453, USA). AFM image was taken by using an Innova microscope. Raman spectra were recorded with a LabRamHR equipped by an Ar<sup>+</sup> laser giving the excitation line of 514.5 nm. Fluorescence spectra were measured on a model F-7000 spectrofluorometer (Hitachi, Japan).

### 2. Fabrication of Molecular Encoder and Decoder

#### 2.1 2-to-1 encoder

10  $\mu$ L of 1  $\mu$ M P1 was prepared in Tris-HCl buffer (20 mM, pH 7.4, containing 0.1M NaCl, 5 mM KCl, and 5 mM MgCl<sub>2</sub>) and mixed with 170  $\mu$ L of 0.5 mg/mL GO for 5 min. Then 20  $\mu$ L of 1  $\mu$ M T1 or 1  $\mu$ M

R as two possible inputs was added into the mixture solution. After 60 min incubation at room temperature, the fluorescence of the mixture solution was detected.

## **2.2 4-to-2 encoder**

10  $\mu$ L of 1  $\mu$ M P1 and 10  $\mu$ L of 50  $\mu$ M P2 were prepared in Tris-HCl buffer (20 mM, pH 7.4, containing 0.1M NaCl, 5 mM KCl, and 5 mM MgCl<sub>2</sub>) and mixed with 160  $\mu$ L of 0.5 mg/mL GO for 5 min, followed by the addition of 20  $\mu$ L of 1  $\mu$ M four possible DNA inputs (R, T1, T2, or T1-T2) to the mixture solution, respectively. After allowing the mixture solution to incubate for 60 min at room temperature, the fluorescence of the mixture solution was detected.

## **2.3 8-to-3 encoder**

10  $\mu$ L of 10  $\mu$ M P1, 10  $\mu$ L of 40  $\mu$ M P2, and 10  $\mu$ L of 10  $\mu$ M P3 were prepared in Tris-HCl buffer (20 mM, pH 7.4, containing 0.1M NaCl, 5 mM KCl, and 5 mM MgCl<sub>2</sub>) and mixed with 150  $\mu$ L of 0.5 mg/mL GO for 5 min at room temperature, followed by the addition of 20  $\mu$ L of 1  $\mu$ M eight possible DNA inputs (R, T1, T2, T1-T2, T1-T3, T2-T3, T1-T2, or T1-T2-T3) to the mixture solution, respectively. After allowing the mixture solution to incubate for 60 min at room temperature, the fluorescence of the mixture solution was detected.

## **2.4 1-to-2 decoder**

10  $\mu$ L of 1  $\mu$ M P1, 10  $\mu$ L of 10  $\mu$ M P2, 10  $\mu$ L of P-C-P1 were prepared in Tris-HCl buffer (20 mM, pH 7.4, containing 0.1M NaCl, 5 mM KCl, and 5 mM MgCl<sub>2</sub>) and mixed with 150  $\mu$ L of 0.5 mg/mL GO for 5 min at room temperature, followed by the addition of two possible DNA inputs (T4 or R) to the mixture solution. After 60 min incubation at room temperature, the fluorescence of the mixture solution was detected.

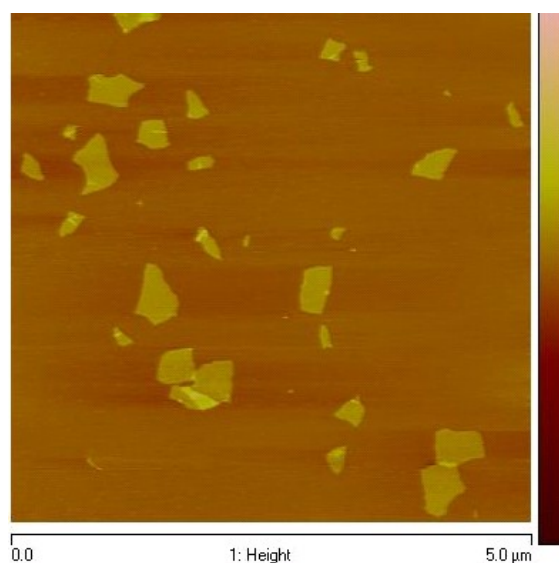

**Fig. S1** AFM image of the obtained GO

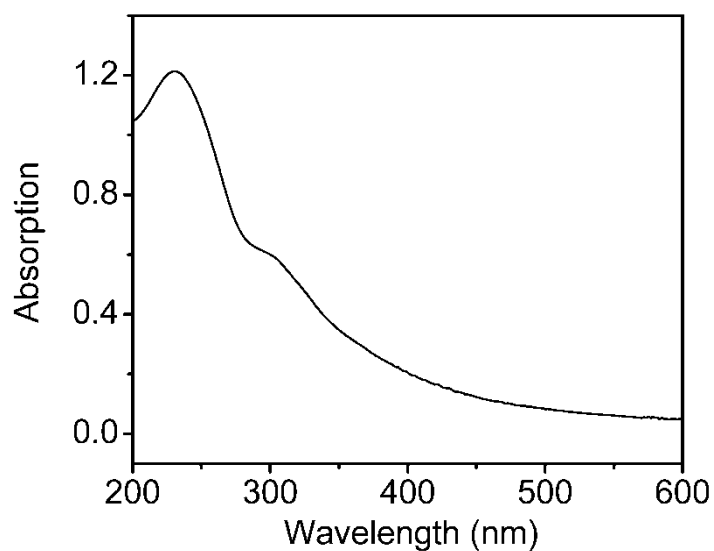

**Fig. S2** UV-Vis absorption spectra of the obtained GO

The as-prepared GO was characterized by atomic force microscopy (AFM) and UV-Vis spectra. As shown in Fig. S1, the size of the obtained GO ranged from about 100 to 630 nm. The aqueous solution of the obtained GO displayed a strong absorption peak at 230 nm and a shoulder at  $\sim 290\text{-}300$  nm (Fig. S2), which correspond to  $\pi - \pi^*$  of C=C and  $n-\pi^*$  transition of C=O band.

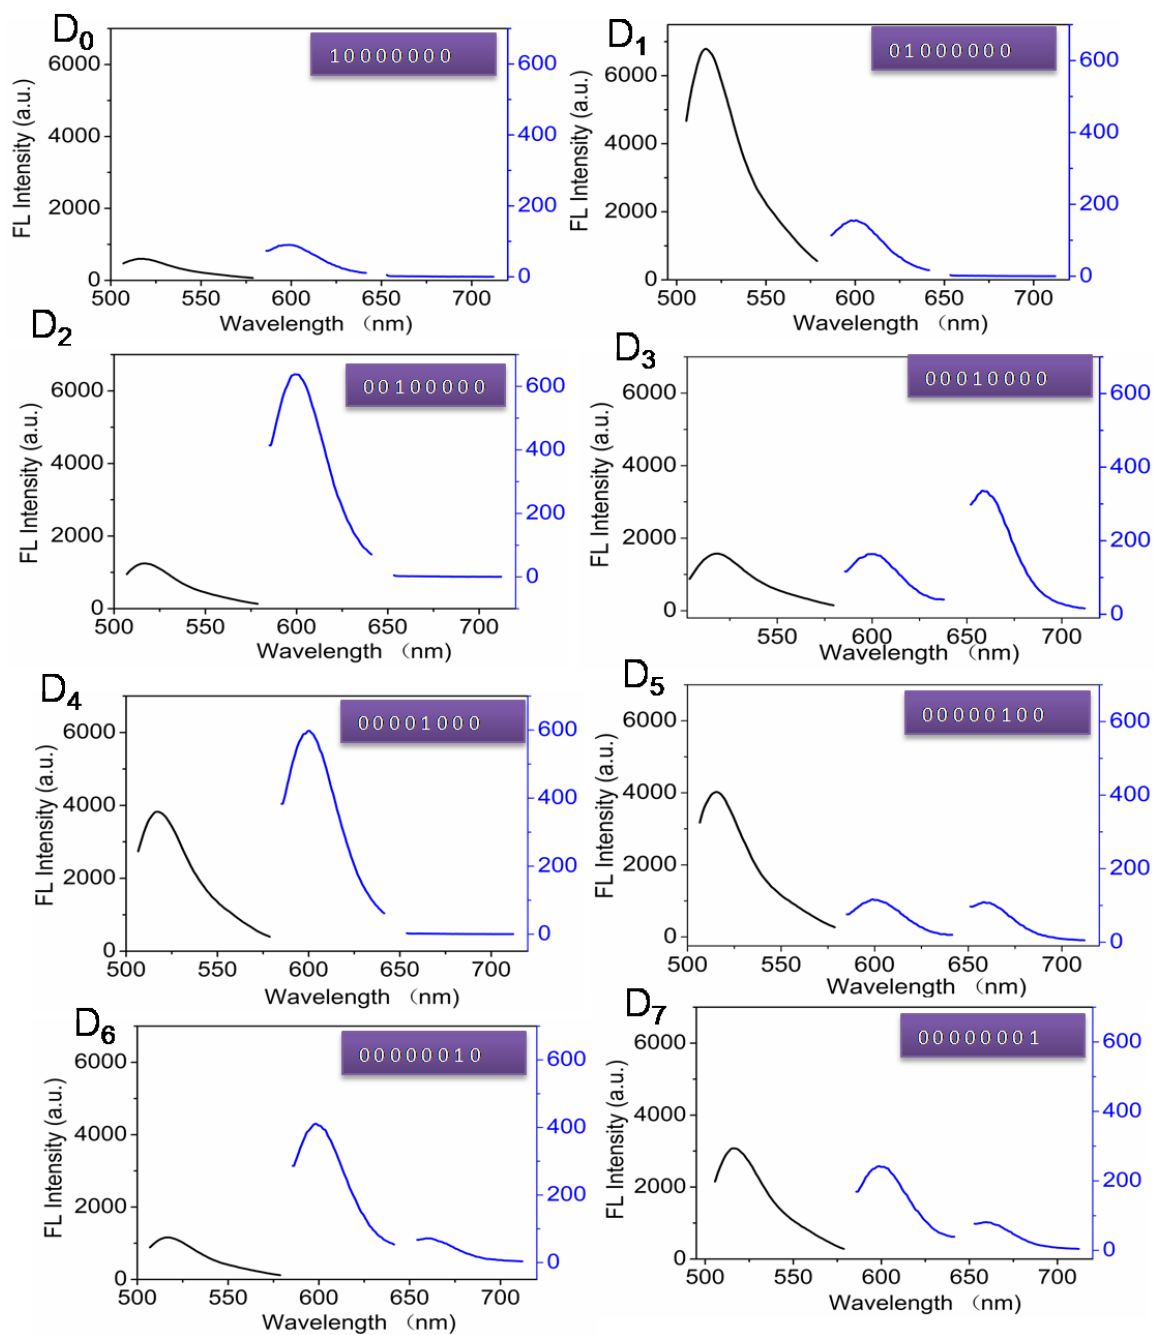

**Fig. S3** Fluorescence spectra of the system of GO, P1, P2 and P3 in the presence of different inputs (D<sub>0</sub>-D<sub>7</sub>) with excitation wavelength of 492, 575, and 643 nm, respectively.

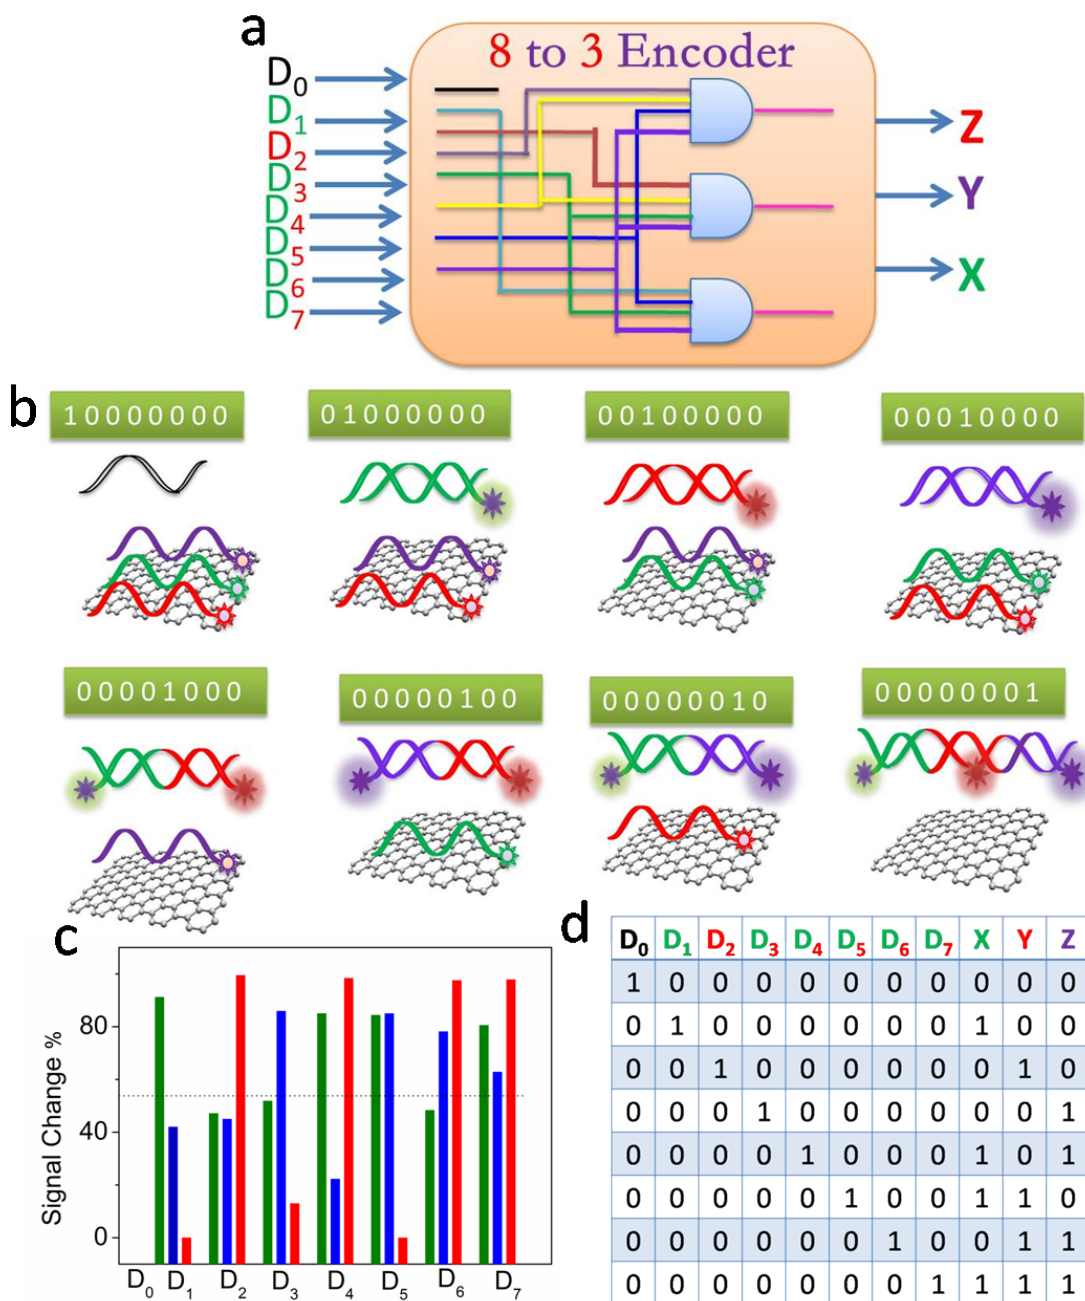

**Fig. S4.** Schematic representation (a-b) for 8-to-3 encoder and fluorescence change (c) in presence of different input signals. Truth table (d) for 8-to-3 encoder.

It is noted that the fluorescence change in the case of 8-to-3 encoder is smaller than that in the case of 2-to-1 or 4-to-2 encoders. This phenomenon is explained as follows. Compared with 2-to-1 and 4-to-2 encoders, 8-to-3 encoder has much more DNA sequence inputs and signal reporters, which might generate the cross reactivity<sup>2,3</sup>, leading to that the fluorescence change of 8-to-3 encoder is smaller than that of 2-to-1 or 4-to-2 encoders.

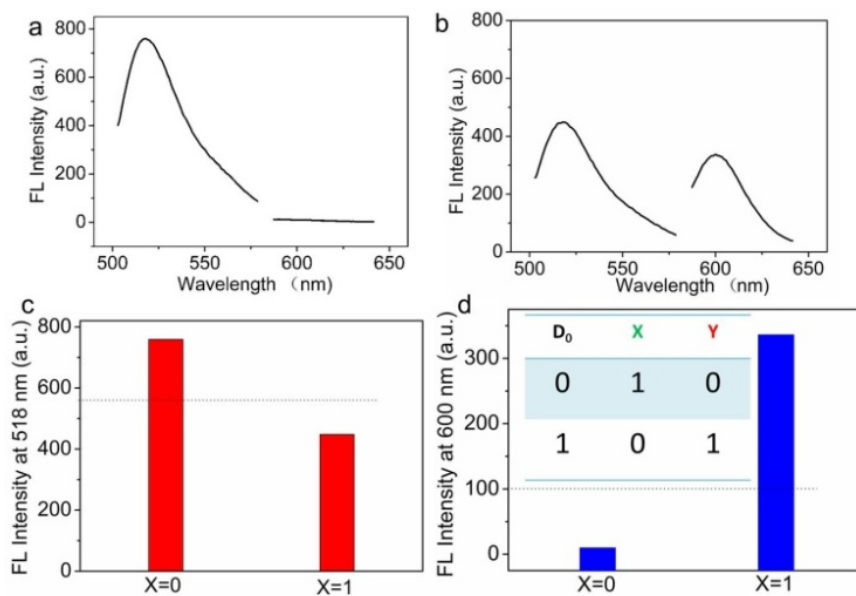

**Fig. S5.** Fluorescence spectra of 1-to-2 decoder in the absence (a) and presence (b) of input with excitation wavelength of 492 and 575 nm, respectively. Fluorescence intensity of FAM (c) and ROX (d) in the absence and presence of input. The inset displays truth table of 1-to-2 decoder.

## Reference

- 1 S. He, B. Song, D. Li, C. Zhu, W. Qi, Y. Wen, L. Wang, S. Song, H. Fang, C. Fan, *Adv. Fun. Mater.* 2010, 20, 453-459.
- 2 E. Cindy, D. Kathleen, K. Kazuyuki, S. Leonard, B. Corey, S. Darryl, D. Peter, L. Peter, *Nucl. Acids Res.* 2000, 28, e32-00.
- 3 L. Kai, H. Allan, D. Robert, G. Patti, W. Sholom, M. Michele, S. David, S. Mark, K. Robert, G. Andrew, A. Steven, S. Mark, *J. Infect. Dis.* 2001, 183, 8-15.
